# Supplementary material for: Sumanene-stacked supramolecular polymers. Dynamic, solvation-directed control
Source: Royal Society of Chemistry journal article supplement (doi:10.1039/d3cc02990e), 2023-01-01
Supplement: d3cc02990e1.pdf [file d3cc02990e1.pdf]

*Electronic Supplementary Information*  
*for*

**Sumanene-stacked supramolecular polymers. Dynamic, solvation-directed control**

*Hiroaki Mizuno, Hironobu Nakazawa, Makoto Harada, Yumi Yakiyama, Hidehiro Sakurai,\* and Gaku Fukuhara\**

## Experimental Procedures

**Instruments.** UV/vis spectra were measured using a JASCO V-560 or -650 spectrometer with a temperature controller. Fluorescence spectra were recorded using an FP-8500 spectrometer equipped with a temperature controller. All solutions were measured in a quartz cell (path lengths of 1, 2, 5, or 10 mm) or a high-pressure cell (path length of 2 mm). Atomic force microscopy (AFM) images were obtained using a Shimadzu SPM-9700HT microscope. Hydrostatic pressure measurements were performed using a custom-built high-pressure apparatus, the details of which have been reported previously.<sup>1</sup> Variable-temperature measurements were performed using a UNISOKU CoolSpek cryostat.

**Materials.** Spectroscopy grade MCH and CH<sub>2</sub>Cl<sub>2</sub> were used. A commercially available highly oriented pyrolytic graphite (HOPG) substrate was used without further treatment. **Sumanene** was synthesized according to literature.<sup>2</sup>

**AFM measurements.** A solution of **sumanene** was dropped onto an HOPG surface, pre-dried by N<sub>2</sub> gas flow and then fully dried under high vacuum, prior to observation by AFM.

**Spectroscopic measurements.** For the spectral analysis, a smoothing process was performed using MATLAB. Specifically, a range of 340–400 nm was extracted from the raw data and then converted to applicable extinction coefficients by smoothing, using the “smoothing spline” method (a smoothing parameter of  $5.614035861113226 \times 10^{-6}$ ).

**Computational studies.** The density functional theory (DFT) calculations were performed using the long-range and dispersion-corrected  $\omega$ B97X-D functional<sup>3</sup> with 6-311G\*\* basis sets.<sup>4</sup> All calculations were performed using the Gaussian 16.<sup>5</sup>

---

<sup>1</sup> H. Mizuno, G. Fukuhara, *Acc. Chem. Res.* **2022**, *55*, 1748-1762.

<sup>2</sup> H. Sakurai, T. Daiko, T. Hirao, *Science* **2003**, *301*, 1878.

<sup>3</sup> J.-D. Chai, M. Head-Gordon, *Phys. Chem. Chem. Phys.* **2008**, *10*, 6615-6620.

<sup>4</sup> R. Krishnan, J. S. Binkley, R. Seeger, J. A. Pople, *J. Chem. Phys.* **1980**, *72*, 650-654.

<sup>5</sup> M. J. Frisch, G. W. Trucks, H. B. Schlegel, G. E. Scuseria, M. A. Robb, J. R. Cheeseman, G. Scalmani, V. Barone, G. A. Petersson, H. Nakatsuji, X. Li, M. Caricato, A. V. Marenich, J. Bloino, B. G. Janesko, R. Gomperts, B. Mennucci, H. P. Hratchian, J. V. Ortiz, A. F. Izmaylov, J. L. Sonnenberg, D. Williams-Young, F. Ding, F. Lipparini, F. Egidi, J. Goings, B. Peng, A. Petrone, T. Henderson, D. Ranasinghe, V. G. Zakrzewski, J. Gao, N. Rega, G. Zheng, W. Liang, M. Hada, M. Ehara, K. Toyota, R. Fukuda, J. Hasegawa, M. Ishida, T. Nakajima, Y. Honda, O. Kitao, H. Nakai, T. Vreven, K. Throssell, J. A. Montgomery, Jr., J. E. Peralta, F. Ogliaro, M. J. Bearpark, J. J. Heyd, E. N. Brothers, K. N. Kudin, V. N. Staroverov, T. A. Keith, R. Kobayashi, J. Normand, K. Raghavachari, A. P. Rendell, J. C. Burant, S. S. Iyengar, J. Tomasi, M. Cossi, J. M. Millam, M. Klene, C. Adamo, R. Cammi, J. W. Ochterski, R. L. Martin, K. Morokuma, O. Farkas, J. B. Foresman, D. J. Fox, Gaussian, Inc. **2016**, Wallingford CT.

**SAXS measurements.** Small-angle X-ray scattering (SAXS) measurements were performed at the BL-6A beamline<sup>6,7</sup> at the Photon Factory of the High Energy Accelerator Research Organization (KEK) in Tsukuba, Japan. The **sumanene** solution was loaded into a custom-built aluminum cell sealed with polypropylene films. The optical path length is set to 18 mm. Because of its strong absorption of X-rays, CH<sub>2</sub>Cl<sub>2</sub> was not used in the SAXS measurements. X-ray wavelength of 1.5 Å and a sample-detector distance of 523 mm (calibrated using silver behenate) gave a detectable  $q$  range of the order of 0.2 to 9.7 nm<sup>-1</sup>. All data were analyzed using the SAngler software package.<sup>8</sup>

**Variable temperature measurements.** The measured temperature was decreased from 60 °C to -50 °C at -1 °C/min. To prevent frost, the cell chamber in the spectrometer was replaced with Ar, and a cell containing the **sumanene** solution was inserted and measured. Dry air flowed continuously during the measurements. However, accurate data could not be obtained below 0 °C due to the frost effect.

**High-pressure measurements.** Since the optical path length is fixed at 2 mm in the high-pressure cell, a 7:3 (v/v) MCH-CH<sub>2</sub>Cl<sub>2</sub> mixture was used from the viewpoint of extinction coefficient.

---

<sup>6</sup> N. Shimizu, T. Mori, N. Igarashi, H. Ohta, Y. Nagatani, T. Kosuge, K. Ito, *J. Phys.: Conf. Ser.* **2013**, 425, 202008.

<sup>7</sup> H. Takagi, N. Igarashi, T. Mori, S. Saijo, H. Ohta, Y. Nagatani, T. Kosuge, N. Shimizu, *AIP Conf. Proc.* **2016**, 1741, 030018.

<sup>8</sup> N. Shimizu, K. Yatabe, Y. Nagatani, S. Saijyo, T. Kosuge, N. Igarashi, *AIP Conf. Proc.* **2016**, 1741, 050017.

# AFM measurements

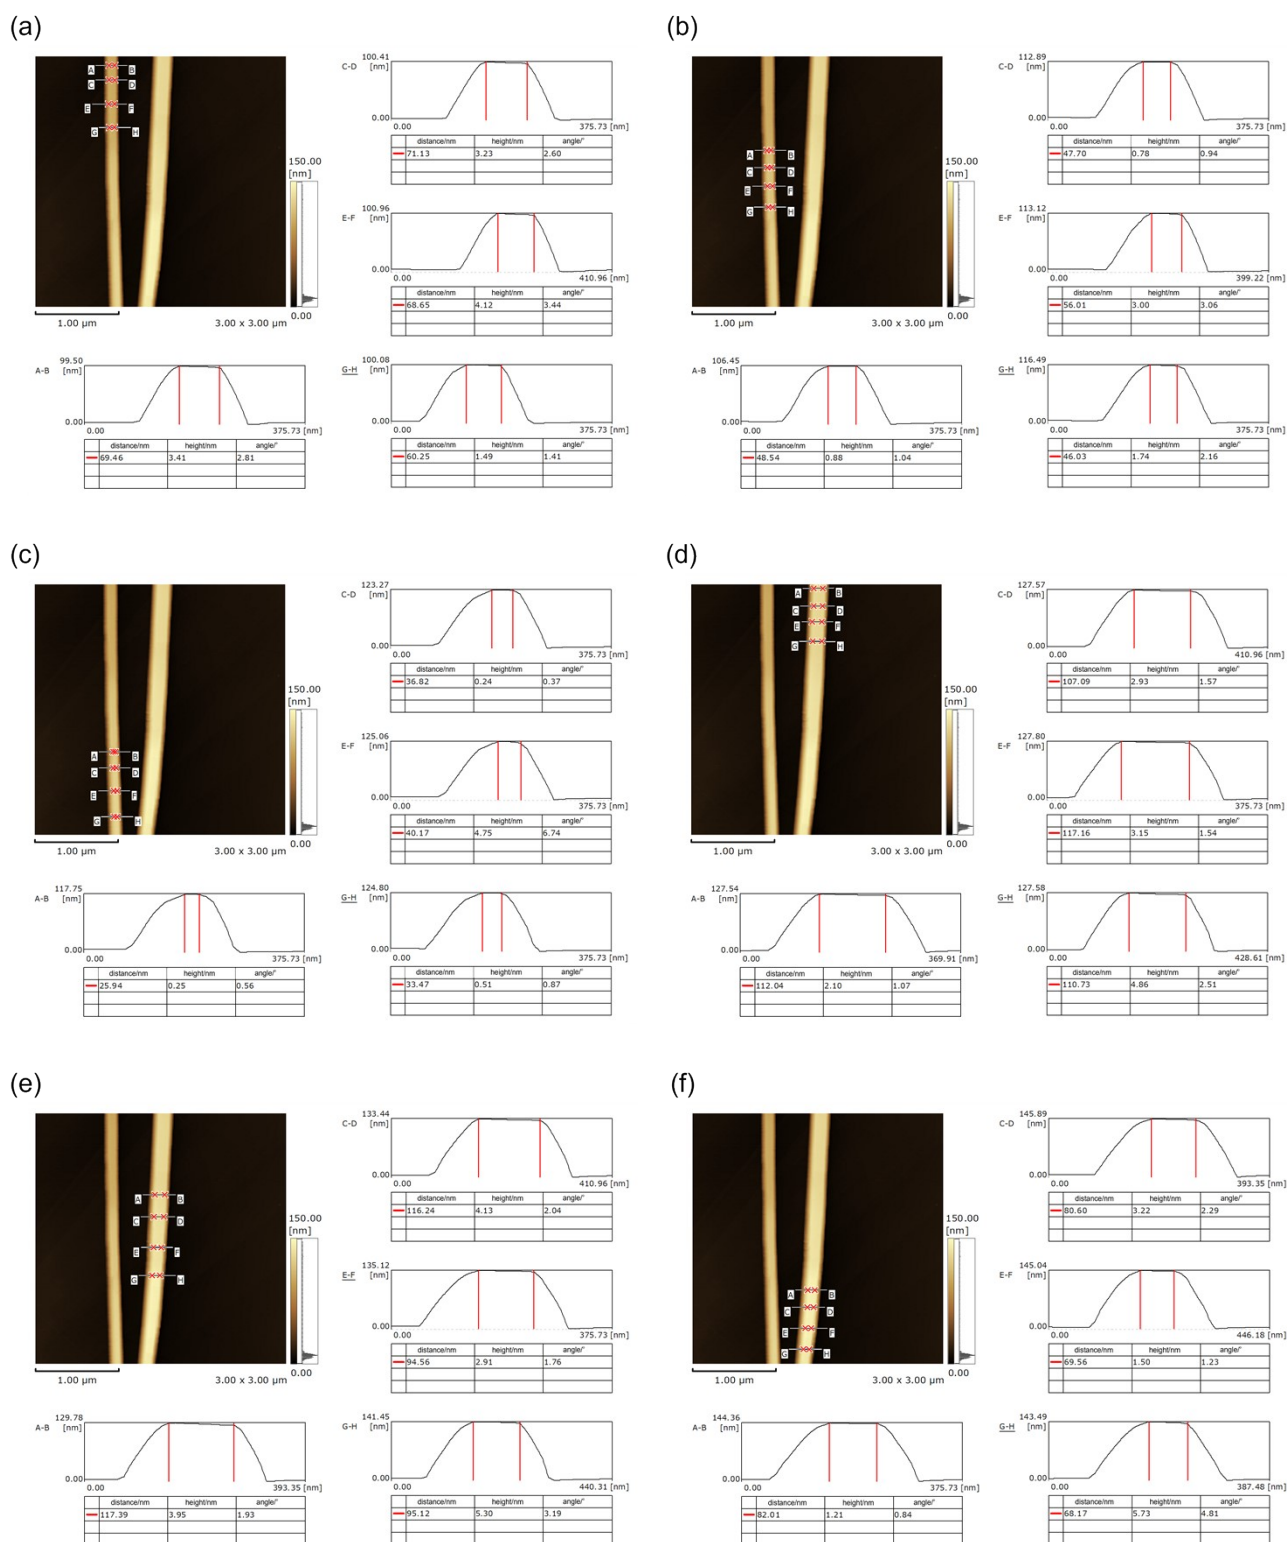

**Figure S1.** (a)-(f) AFM images and line profiles of sumanene (1.95 mM) prepared from the MCH solution on an HOPG surface.

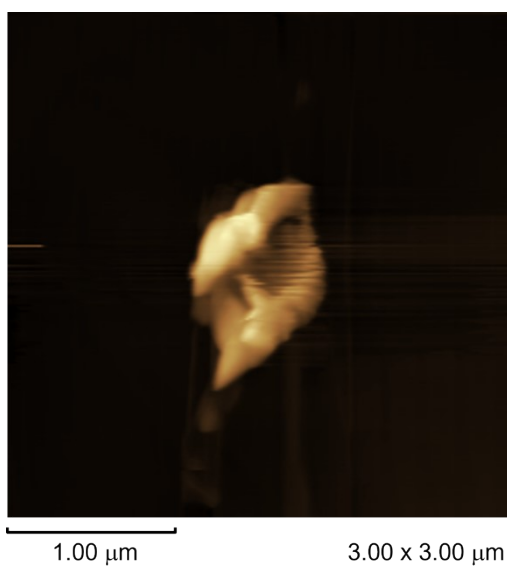

**Figure S2.** AFM image of **sumanene** (95.3  $\mu\text{M}$ ) prepared from the MCH solution on an HOPG surface.

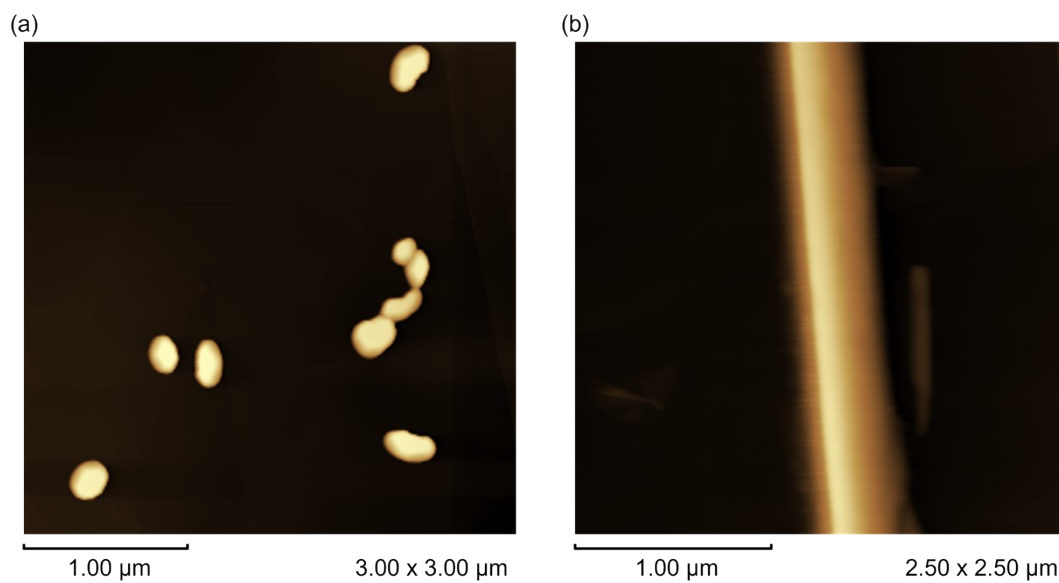

**Figure S3.** AFM images of **sumanene** ((a) 2.08 mM and (b) 34.3 mM) prepared from the  $\text{CH}_2\text{Cl}_2$  solution on an HOPG surface. (b) width,  $286.7 \pm 68.4$  nm; height,  $43.7 \pm 30.7$  nm.

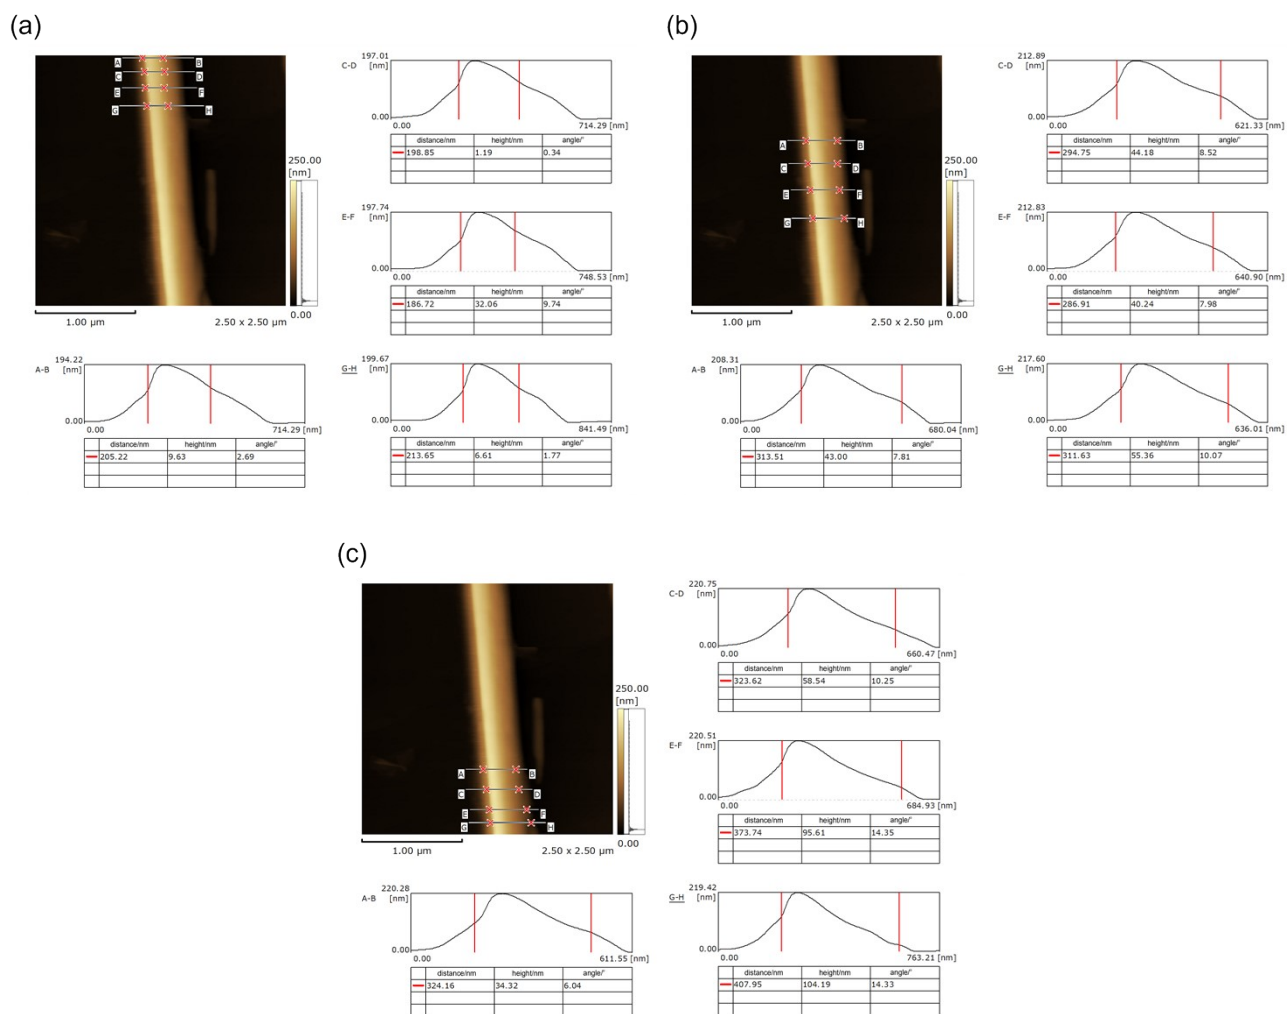

**Figure S4.** (a)-(c) AFM images and line profiles of **sumanene** (34.3 mM) prepared from the  $\text{CH}_2\text{Cl}_2$  solution on an HOPG surface.

## DFT calculations

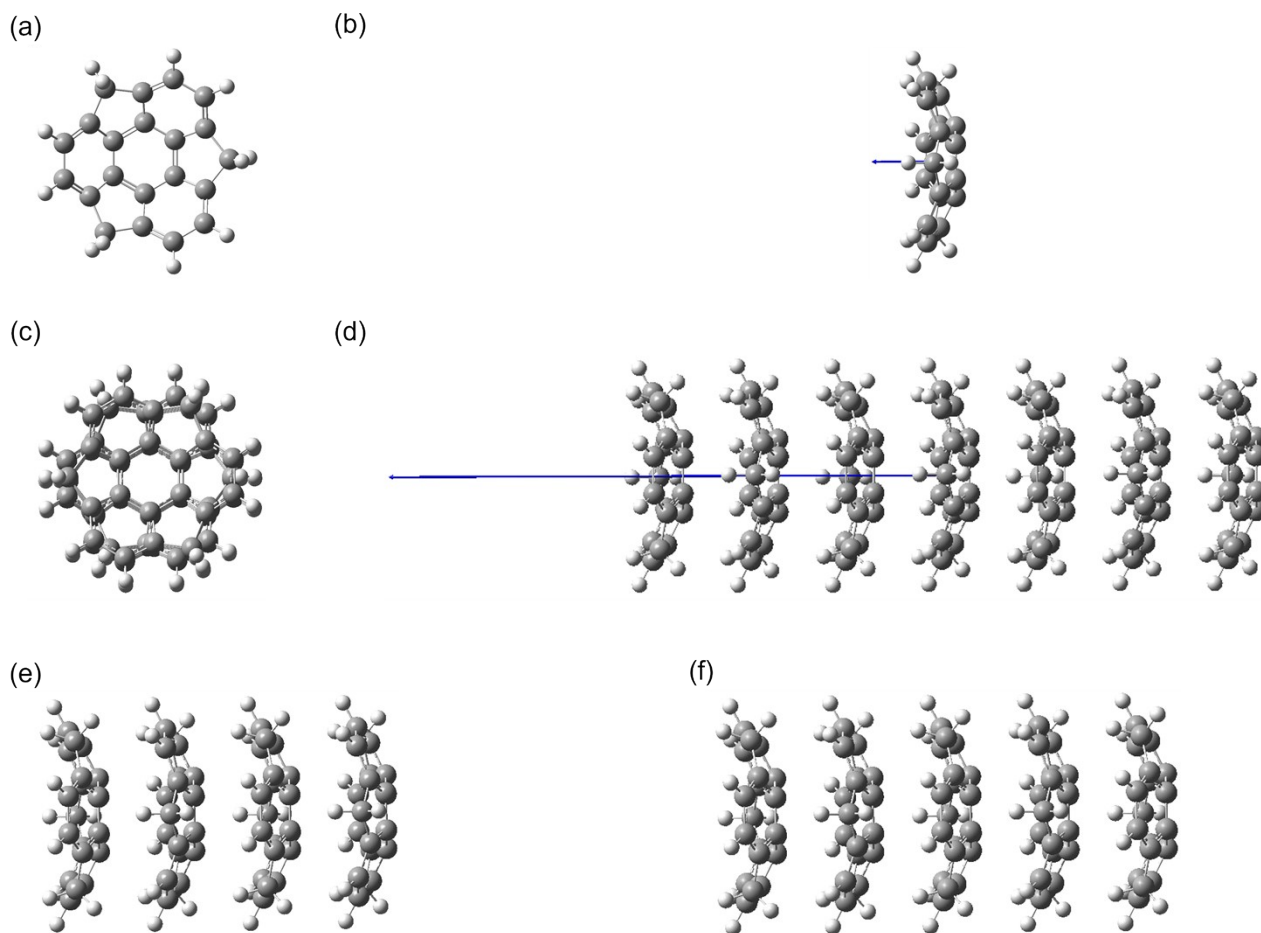

**Figure S5.** Optimized structures and dipole moments of **sumanene**: (a,b) monomer, (c,d) heptamer, (e) tetramer, and (f) pentamer. Dipole moment: monomer, 2.7 D; octamer, 21.7 D (3.1 D per monomer).



## Supramolecular polymerization analysis<sup>9,10</sup>

### Chemical equilibrium and sequential equations based on the (anti-)cooperative model

The (anti-)cooperative model assumes different equilibrium constants for the nucleation and elongation stages, and the chemical equilibrium and sequential equations for the formation of a supramolecular polymer of a certain chemical species “A”, are given as follows.

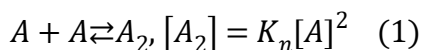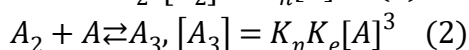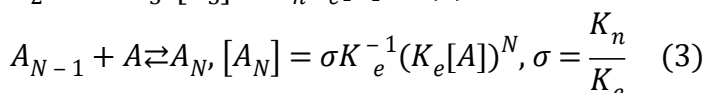

where  $A_X$  represents the X-mer of A,  $K_n$  is the equilibrium constant between the two monomers,  $K_e$  is the equilibrium constant between the polymer and monomer, and  $\sigma$  is the cooperative factor. When  $\sigma < 1$ , it is a cooperative model; when  $\sigma > 1$ , it is an anti-cooperative model.

### Mass balance

From the sequential equation, the material balance can be expressed as follows.

$$K_e C_t = (1 - \sigma) K_e [A] + \frac{\sigma K_e [A]}{(1 - K_e [A])^2} \quad (4)$$

where  $C_t$  represents the total concentration of “A”. In other words,

$$C_t = [A] + \sum_{i=2}^{\infty} i[A_i] \quad (5)$$

### Degree of polymerization ( $\alpha_{agg}$ )

Degree of polymerization ( $\alpha_{agg}$ ) can be expressed as follows.

$$\alpha_{agg} = 1 - \frac{K_e [A]}{K_e C_t} \quad (6)$$

On the other hand,  $\alpha_{agg}$  is determined by the extinction coefficient as follows.

---

<sup>9</sup> D. Zhao, J. S. Moore, *Org. Biomol. Chem.* **2003**, *1*, 3471-3491.

<sup>10</sup> P. P. N. Syamala, F. Würthner, *Chem.-Eur. J.* **2020**, *26*, 8426-8434.

$$\alpha_{agg} = 1 - \frac{\bar{\varepsilon}_{C_t} - \varepsilon_{agg}}{\varepsilon_{mon} - \varepsilon_{agg}} \quad (7)$$

where  $\bar{\varepsilon}_{C_t}$  represents the apparent extinction coefficient at a given concentration,  $\varepsilon_{agg}$  the extinction coefficient of the aggregates and  $\varepsilon_{mon}$  the extinction coefficients of the monomers. The latter two values were determined from the concentration-dependent UV spectra.

#### (anti-)cooperative model

We analyzed the supramolecular polymerization based on the (anti)cooperative model by plotting and fitting  $\alpha_{agg}$  against  $C_t$  using Equations 4 and 7.

#### isodesmic model

The isodesmic model assumes that the equilibrium constants for the nucleation and elongation stages are identical. In other words,

$$K_n = K_e = K, \sigma = 1 \quad (8)$$

Substituting Equation 8 into Equations (4) and (6) yields Equations 9 and 10, respectively.

$$KC_t = \frac{K[A]}{(1 - K[A])^2} \quad (9)$$

$$\alpha_{agg} = 1 - \frac{K[A]}{KC_t} \quad (10)$$

Furthermore, substituting equation 9 into equation 10 yields equation 11.

$$\alpha_{agg} = 1 - \frac{2KC_t + 1 - \sqrt{4KC_t + 1}}{2K^2C_t^2} \quad (11)$$

Finally, the supramolecular polymerization was analyzed based on the isodesmic model by plotting and fitting  $\alpha_{agg}$  against  $C_t$  using Equation 11. The number-average degree of polymerization (DP) in the isodesmic model was calculated based on equation 12.

$$DP = \frac{C_t}{[A] + \sum_{i=2}^{\infty} [A_i]} = \frac{\sqrt{4KC_t + 1} + 1}{2} \quad (12)$$

## Concentration-dependent measurements

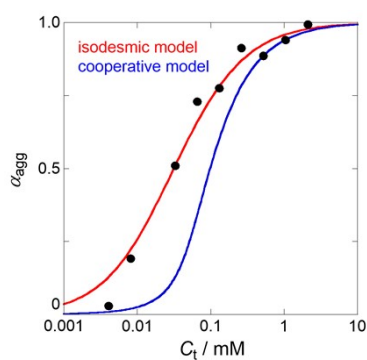

**Figure S6.** Plot of the degree of polymerization ( $\alpha_{\text{agg}}$ ) of **sumanene** (monitored at 356 nm in Figure 2a) as a function of  $C_t$ ; the red line represents the fitting result based on the isodesmic model and the blue line represents the anti-cooperative model, respectively.

**Table S1.** Equilibrium constants of **sumanene** supramolecular polymerization in MCH at 25 °C and 0.1 MPa based on the isodesmic and cooperative models.

| fitting model | $K$ or $K_c / \text{M}^{-1}$ | $\sigma$        | correlation coefficient |
|---------------|------------------------------|-----------------|-------------------------|
| isodesmic     | $18600 \pm 2200$             | 1               | 0.990                   |
| cooperative   | $15200 \pm 200$              | $0.07 \pm 0.02$ | 0.994                   |

## SAXS analysis

The equation for the cylinder model is expressed as equation 13<sup>11</sup>

$$I(q) = \int_0^{\frac{\pi}{2}} \frac{\sin^2 \left( q \frac{L}{2} \cos \theta \right) 4J_1^2(qR \sin \theta)}{q^2 \left( \frac{L}{2} \right)^2 \cos^2 \theta \quad q^2 R^2 \sin^2 \theta} \sin \theta d\theta \quad (13)$$

$$J_1 = 3 \frac{\sin qR - qR \cos qR}{(qR)^3} \quad (14)$$

where  $L$  represents the length of a cylinder,  $R$  the radius of a cylinder and  $J_1$  the first-order Bessel function. The  $L$  and  $R$  values were obtained from the optimized structure using DFT calculations:  $L = 1.359$  (tetramer),  $1.727$  (pentamer) nm and,  $R = 0.407$  nm.

---

<sup>11</sup> A. Guinier, G. Fournet, *Small-Angle Scattering of X-rays* John Wiley & Sons, 1955.

### Variable temperature measurements

To consider the effect of solvent density change with temperature, the temperature dependence data of the MCH density were obtained from the literature<sup>12,13</sup> and fitted with a quadratic function. Thus, equation 15 was obtained.

$$\rho(T) = -7.38 \times 10^{-7}T^2 - 4.85 \times 10^{-4}T + 0.975 \quad (15)$$

where  $\rho(T)$  represents the density of MCH at a given temperature. The absorbance was corrected by substituting  $\rho(T)$  into equation 16.

$$A_{corrected} = A(T) \times \frac{\rho(T)}{\rho(298.15)} = A(T) \times \frac{\rho(T)}{0.76482} \quad (16)$$

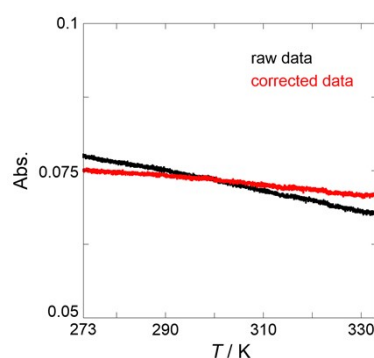

**Figure S7.** Temperature-dependent absorption of **sumanene** (101  $\mu$ M) in MCH monitored at 356 nm (black: raw data and red: corrected data).

<sup>12</sup> J. Jonas, D. Hasha, S. G. Huang, *J. Chem. Phys.* **1979**, *71*, 3996-4000.

<sup>13</sup> M. R. Usman, Z. Shahid, M. S. Akram, R. Aslam, *Int. J. Thermophys.* **2020**, *41*, 44.

## High pressure measurements

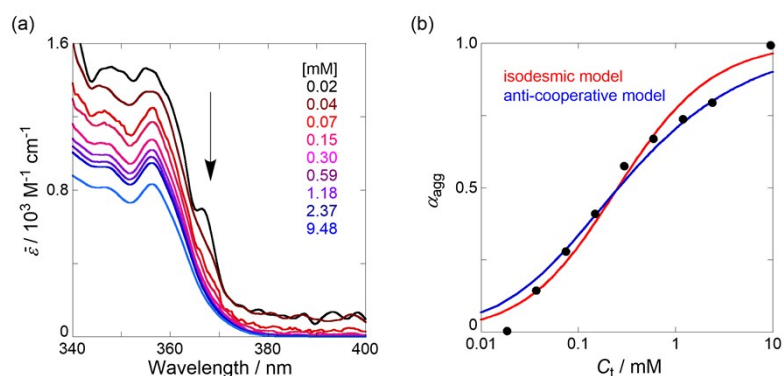

**Figure S8.** (a) Concentration-dependent UV spectra of **sumanene** (0.02-9.48 mM, from black to blue) in 7:3 (v/v) MCH-CH<sub>2</sub>Cl<sub>2</sub> at room temperature and 100 MPa, measured in a high-pressure cell. (b) Plot of the degree of polymerization ( $\alpha_{\text{agg}}$ ) of **sumanene** (monitored at 356 nm in (a)) as a function of  $C_t$ ; the red line represents the fitting result based on the isodesmic model and the blue line represents the anti-cooperative model, respectively.

**Table S2.** Equilibrium constants of **sumanene** supramolecular polymerization in 7:3 (v/v) MCH-CH<sub>2</sub>Cl<sub>2</sub> at room temperature and 100 MPa based on the isodesmic and anti-cooperative models.

| fitting model    | $K$ or $K_c / \text{M}^{-1}$ | $\sigma$        | correlation coefficient |
|------------------|------------------------------|-----------------|-------------------------|
| isodesmic        | $2300 \pm 260$               | 1               | 0.987                   |
| anti-cooperative | $150 \pm 90$                 | $25.4 \pm 17.7$ | 0.999                   |

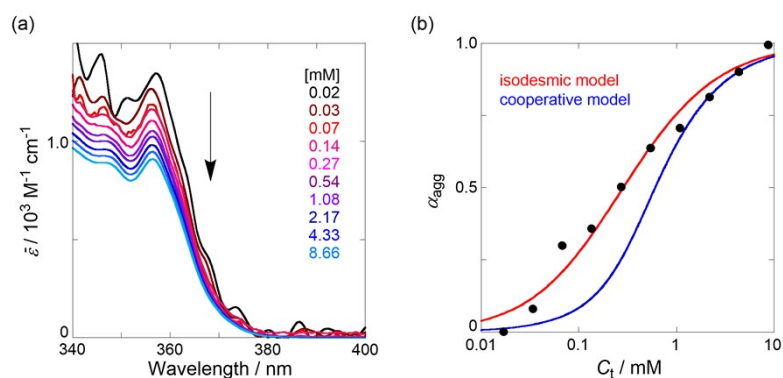

**Figure S9.** (a) Concentration-dependent UV spectra of **sumanene** (0.02-8.66 mM, from black to sky blue) in 7:3 (v/v) MCH-CH<sub>2</sub>Cl<sub>2</sub> at room temperature and 150 MPa, measured in a high-pressure cell. (b) Plot of the degree of polymerization ( $\alpha_{\text{agg}}$ ) of **sumanene** (monitored at 356 nm in (a)) as a function of  $C_t$ ; the red line represents the fitting result based on the isodesmic model and the blue line represents the cooperative model, respectively.

**Table S3.** Equilibrium constants of **sumanene** supramolecular polymerization in 7:3 (v/v) MCH-CH<sub>2</sub>Cl<sub>2</sub> at room temperature and 150 MPa based on the isodesmic and cooperative models.

| fitting model | $K$ or $K_e / M^{-1}$ | $\sigma$        | correlation coefficient |
|---------------|-----------------------|-----------------|-------------------------|
| isodesmic     | $2060 \pm 220$        | 1               | 0.989                   |
| cooperative   | $2000 \pm 60$         | $0.18 \pm 0.06$ | 0.991                   |

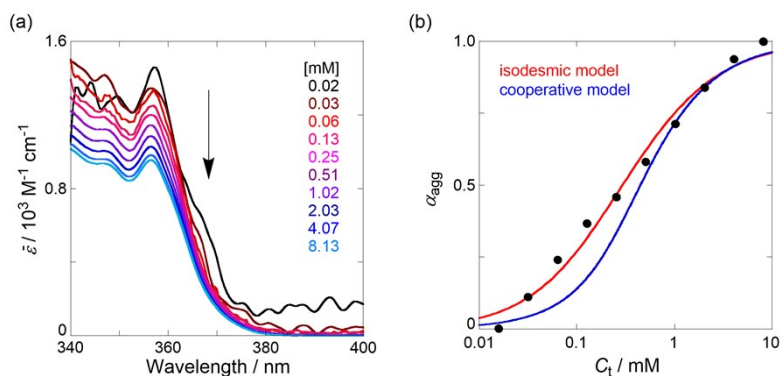

**Figure S10.** (a) Concentration-dependent UV spectra of **sumanene** (0.02-8.13 mM, from black to sky blue) in 7:3 (v/v) MCH-CH<sub>2</sub>Cl<sub>2</sub> at room temperature and 200 MPa, measured in a high-pressure cell. (b) Plot of the degree of polymerization ( $\alpha_{agg}$ ) of **sumanene** (monitored at 356 nm in (a)) as a function of  $C_1$ ; the red line represents the fitting result based on the isodesmic model and the blue line represents the cooperative model, respectively.

**Table S4.** Equilibrium constants of **sumanene** supramolecular polymerization in 7:3 (v/v) MCH-CH<sub>2</sub>Cl<sub>2</sub> at room temperature at 200 MPa based on isodesmic and cooperative models.

| fitting model | $K$ or $K_e / M^{-1}$ | $\sigma$        | correlation coefficient |
|---------------|-----------------------|-----------------|-------------------------|
| isodesmic     | $1990 \pm 170$        | 1               | 0.993                   |
| cooperative   | $2370 \pm 80$         | $0.28 \pm 0.07$ | 0.997                   |



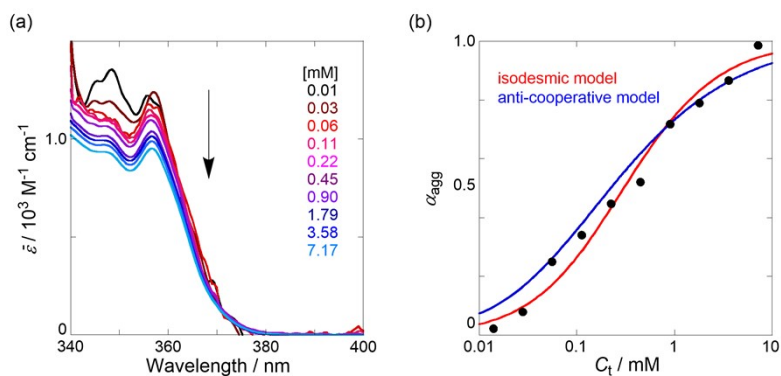

**Figure S11.** (a) Concentration-dependent UV spectra of **sumanene** (0.02-7.17 mM, from black to sky blue) in 7:3 (v/v) MCH-CH<sub>2</sub>Cl<sub>2</sub> at room temperature and 250 MPa, measured in a high-pressure cell. (b) Plot of the degree of polymerization ( $\alpha_{\text{agg}}$ ) of **sumanene** (monitored at 356 nm in (a)) as a function of  $C_t$ ; the red line represents the fitting result based on the isodesmic model and the blue line represents the anti-cooperative model, respectively.

**Table S5.** Equilibrium constants of **sumanene** supramolecular polymerization in 7:3 (v/v) MCH-CH<sub>2</sub>Cl<sub>2</sub> at room temperature at 250 MPa based on isodesmic and anti-cooperative models.

| fitting model    | $K$ or $K_e / \text{M}^{-1}$ | $\sigma$        | correlation coefficient |
|------------------|------------------------------|-----------------|-------------------------|
| isodesmic        | $1940 \pm 190$               | 1               | 0.990                   |
| anti-cooperative | $490 \pm 280$                | $8.39 \pm 6.82$ | 0.993                   |

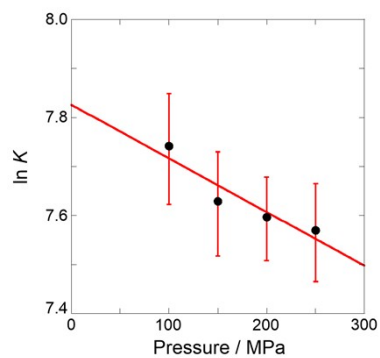

**Figure S12.** Natural logarithm plot of the equilibrium constants upon the **sumanene** supramolecular polymerization in 7:3 (v/v) MCH-CH<sub>2</sub>Cl<sub>2</sub> as a function of pressure.

**Table S6.** Equilibrium constants of **sumanene** supramolecular polymerization in 7:3 (v/v) MCH-CH<sub>2</sub>Cl<sub>2</sub> solution based on the isodesmic model under high pressure.

| Pressure / MPa | $K / M^{-1}$ | correlation coefficient | DP <sup>a</sup> |
|----------------|--------------|-------------------------|-----------------|
| 100            | 2300 ± 260   | 0.987                   | 5.2             |
| 150            | 2060 ± 220   | 0.989                   | 4.8             |
| 200            | 1990 ± 170   | 0.993                   | 4.6             |
| 250            | 1940 ± 190   | 0.993                   | 4.3             |

*a*: number-average degree of polymerization at the maximum measured concentration.

## Solvent effect of sumanene supramolecular polymerization

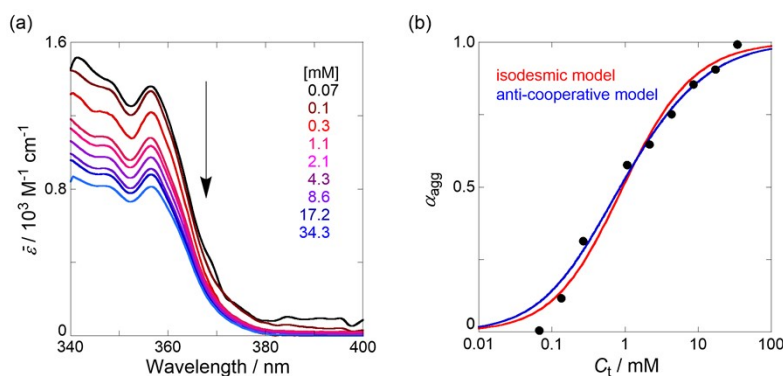

**Figure S13.** (a) Concentration-dependent UV spectra of **sumanene** (0.07-34.3 mM, from black to sky blue) in  $\text{CH}_2\text{Cl}_2$  at 25 °C and 0.1 MPa, measured in a 1 mm cell. (b) Plot of the degree of polymerization ( $\alpha_{\text{agg}}$ ) of **sumanene** (monitored at 360 nm in (a)) as a function of  $C_t$ ; the red line represents the fitting result based on the isodesmic model and the blue line represents the anti-cooperative model, respectively.

**Table S7.** Equilibrium constants of **sumanene** supramolecular polymerization in  $\text{CH}_2\text{Cl}_2$  at room temperature at 0.1 MPa based on isodesmic and anti-cooperative models.

| fitting model    | $K$ or $K_c / \text{M}^{-1}$ | $\sigma$        | correlation coefficient |
|------------------|------------------------------|-----------------|-------------------------|
| isodesmic        | $630 \pm 70$                 | 1               | 0.991                   |
| anti-cooperative | $320 \pm 20$                 | $2.85 \pm 0.59$ | 0.997                   |

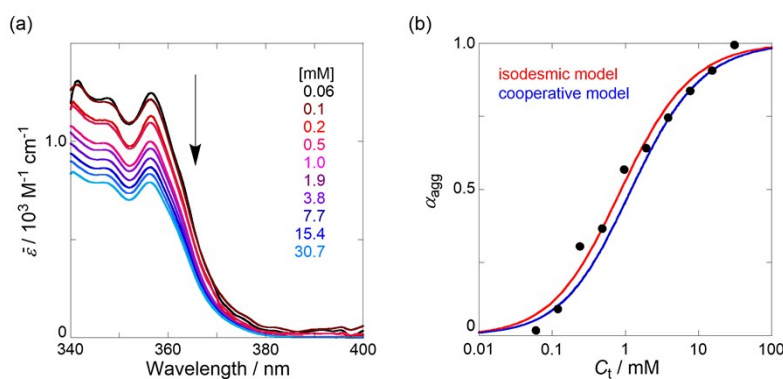

**Figure S14.** (a) Concentration-dependent UV spectra of **sumanene** (0.06-30.7 mM, from black to sky blue) in 1:9 (v/v) MCH- $\text{CH}_2\text{Cl}_2$  solution at 25 °C and 0.1 MPa, measured in a 1 mm cell. (b) Plot of the degree of polymerization ( $\alpha_{\text{agg}}$ ) of **sumanene** (monitored at 356 nm in (a)) as a function of  $C_t$ ; the red line represents the fitting result based on the isodesmic model and the blue line represents the cooperative model, respectively.

**Table S8.** Equilibrium constants of **sumanene** supramolecular polymerization in 1:9 (v/v) MCH-CH<sub>2</sub>Cl<sub>2</sub> solution at room temperature and 0.1 MPa based on isodesmic and cooperative models.

| fitting model | $K$ or $K_e / M^{-1}$ | $\sigma$        | correlation coefficient |
|---------------|-----------------------|-----------------|-------------------------|
| isodesmic     | $670 \pm 60$          | 1               | 0.991                   |
| cooperative   | $490 \pm 10$          | $0.99 \pm 0.11$ | 0.999                   |

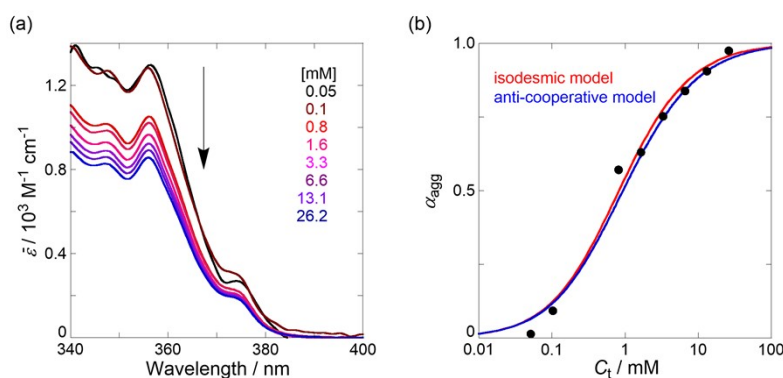

**Figure S15.** (a) Concentration-dependent UV spectra of **sumanene** (0.05-26.2 mM, from black to navy) in 1:3 (v/v) MCH-CH<sub>2</sub>Cl<sub>2</sub> solution at 25 °C and 0.1 MPa, measured in a 1 mm cell. (b) Plot of the degree of polymerization ( $\alpha_{agg}$ ) of **sumanene** (monitored at 360 nm in (a)) as a function of  $C_1$ ; the red line represents the fitting result based on the isodesmic model and the blue line represents the anti-cooperative model, respectively.

**Table S9.** Equilibrium constants of **sumanene** supramolecular polymerization in 1:3 (v/v) MCH-CH<sub>2</sub>Cl<sub>2</sub> solution at room temperature and 0.1 MPa based on the isodesmic and anti-cooperative models.

| fitting model    | $K$ or $K_e / M^{-1}$ | $\sigma$        | correlation coefficient |
|------------------|-----------------------|-----------------|-------------------------|
| isodesmic        | $710 \pm 70$          | 1               | 0.994                   |
| anti-cooperative | $530 \pm 10$          | $1.30 \pm 0.13$ | 0.999                   |

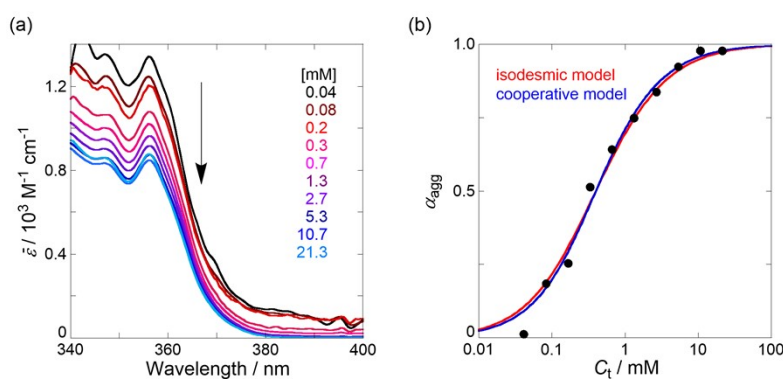

**Figure S16.** (a) Concentration-dependent UV spectra of **sumanene** (0.04-21.3 mM, from black to sky blue) in 2:3 (v/v) MCH-CH<sub>2</sub>Cl<sub>2</sub> solution at 25 °C and 0.1 MPa, measured in a 1 mm cell. (b) Plot of the degree of polymerization ( $\alpha_{agg}$ ) of **sumanene** (monitored at 360 nm in (a)) as a function of  $C_t$ ; the red line represents the fitting result based on the isodesmic model and the blue line represents the cooperative model, respectively.

**Table S10.** Equilibrium constants of **sumanene** supramolecular polymerization in 2:3 (v/v) MCH-CH<sub>2</sub>Cl<sub>2</sub> solution at room temperature and 0.1 MPa based on the isodesmic and cooperative models.

| fitting model | $K$ or $K_c / M^{-1}$ | $\sigma$        | correlation coefficient |
|---------------|-----------------------|-----------------|-------------------------|
| isodesmic     | $1470 \pm 140$        | 1               | 0.992                   |
| cooperative   | $1880 \pm 10$         | $0.64 \pm 0.04$ | 0.999                   |

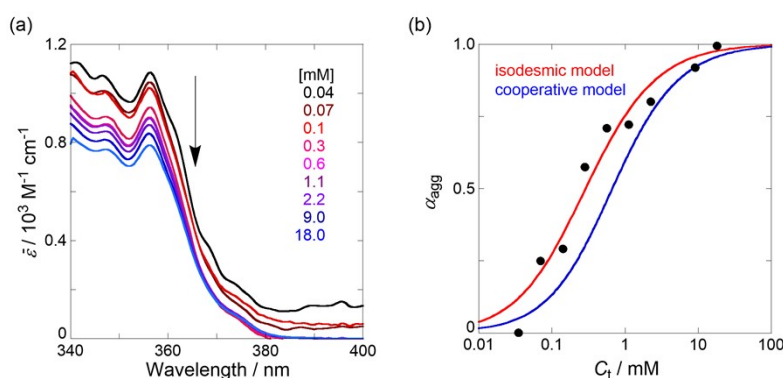

**Figure S17.** (a) Concentration-dependent UV spectra of **sumanene** (0.04-18.0 mM, from black to blue) in 1:1 (v/v) MCH-CH<sub>2</sub>Cl<sub>2</sub> solution at 25 °C and 0.1 MPa, measured in a 2 mm cell. (b) Plot of the degree of polymerization ( $\alpha_{agg}$ ) of **sumanene** (monitored at 360 nm in (a)) as a function of  $C_t$ ; the red line represents the fitting result based on the isodesmic model and the blue line represents the cooperative model, respectively.

**Table S11.** Equilibrium constants of **sumanene** supramolecular polymerization in 1:1 (v/v) MCH-CH<sub>2</sub>Cl<sub>2</sub> solution at room temperature and 0.1 MPa based on isodesmic and cooperative models.

| fitting model | $K$ or $K_e / M^{-1}$ | $\sigma$        | correlation coefficient |
|---------------|-----------------------|-----------------|-------------------------|
| isodesmic     | $2030 \pm 300$        | 1               | 0.979                   |
| cooperative   | $1050 \pm 40$         | $0.73 \pm 0.18$ | 0.997                   |

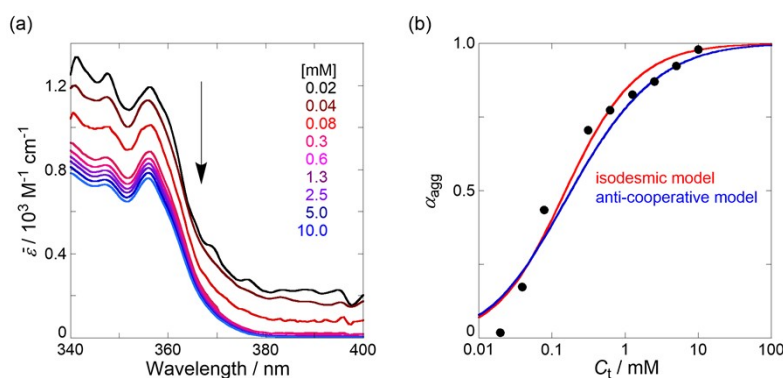

**Figure S18.** (a) Concentration-dependent UV spectra of **sumanene** (0.02-10.0 mM, from black to blue) in 3:1 (v/v) MCH-CH<sub>2</sub>Cl<sub>2</sub> solution at 25 °C and 0.1 MPa, measured in a 5 mm cell. (b) Plot of the degree of polymerization ( $\alpha_{agg}$ ) of **sumanene** (monitored at 356 nm in (a)) as a function of  $C_1$ ; the red line represents the fitting result based on the isodesmic model and the blue line represents the anti-cooperative model, respectively.

**Table S12.** Equilibrium constants of **sumanene** supramolecular polymerization in 3:1 (v/v) MCH-CH<sub>2</sub>Cl<sub>2</sub> solution at room temperature and 0.1 MPa based on the isodesmic and anti-cooperative models.

| fitting model    | $K$ or $K_e / M^{-1}$ | $\sigma$        | correlation coefficient |
|------------------|-----------------------|-----------------|-------------------------|
| isodesmic        | $3800 \pm 570$        | 1               | 0.985                   |
| anti-cooperative | $1420 \pm 170$        | $3.10 \pm 1.04$ | 0.994                   |

## Summary of structure optimization

### Sumanene monomer

| Symbol | X          | Y          | Z          |
|--------|------------|------------|------------|
| C      | 1.4053125  | 0.0159229  | -0.7013613 |
| C      | -1.4053125 | 0.0159229  | -0.7013613 |
| C      | 0.7164459  | 1.2090749  | -0.7013613 |
| C      | 0.6888666  | -1.2249978 | -0.7013613 |
| C      | -0.6888666 | -1.2249978 | -0.7013613 |
| C      | -0.7164459 | 1.2090749  | -0.7013613 |
| C      | 1.2057868  | 2.3481307  | -0.0691930 |
| C      | 2.4939784  | 2.2613631  | 0.4521217  |
| H      | 2.9320307  | 3.0964874  | 0.9893603  |
| C      | 2.6364343  | -0.1298234 | -0.0691930 |
| C      | 3.2053871  | 1.0291671  | 0.4521217  |
| H      | 4.1476521  | 0.9909694  | 0.9893603  |
| C      | -1.2057868 | 2.3481307  | -0.0691930 |
| C      | -2.4939784 | 2.2613631  | 0.4521217  |
| H      | -2.9320307 | 3.0964874  | 0.9893603  |
| C      | -3.2053871 | 1.0291671  | 0.4521217  |
| H      | -4.1476521 | 0.9909694  | 0.9893603  |
| C      | -2.6364343 | -0.1298234 | -0.0691930 |
| C      | -1.4306475 | -2.2183074 | -0.0691930 |
| C      | -0.7114087 | -3.2905302 | 0.4521217  |
| H      | -1.2156214 | -4.0874568 | 0.9893603  |
| C      | 0.7114087  | -3.2905302 | 0.4521217  |
| H      | 1.2156214  | -4.0874568 | 0.9893603  |
| C      | 1.4306475  | -2.2183074 | -0.0691930 |
| C      | -2.8409447 | -1.6402202 | 0.1867129  |
| H      | -3.5886715 | -2.0719205 | -0.4874684 |
| H      | -3.1726400 | -1.8317246 | 1.2096614  |
| C      | 0.0000000  | 3.2804404  | 0.1867129  |
| H      | 0.0000000  | 4.1438410  | -0.4874684 |
| H      | 0.0000000  | 3.6634492  | 1.2096614  |
| C      | 2.8409447  | -1.6402202 | 0.1867129  |
| H      | 3.5886715  | -2.0719205 | -0.4874684 |
| H      | 3.1726400  | -1.8317246 | 1.2096614  |

Total energy: -807.330745 Hartree

**Sumanene tetramer**

| Symbol | X         | Y          | Z          |
|--------|-----------|------------|------------|
| C      | 4.8421800 | 1.2957290  | -0.5337610 |
| C      | 4.8406430 | -1.2855680 | 0.5616440  |
| C      | 4.8418650 | 1.1280030  | 0.8310180  |
| C      | 4.8419070 | 0.1545930  | -1.3937490 |
| C      | 4.8410800 | -1.1111710 | -0.8566070 |
| C      | 4.8415630 | -0.1874440 | 1.3891360  |
| C      | 5.4650270 | 2.0269380  | 1.6909840  |
| C      | 5.9702520 | 3.1860120  | 1.1096150  |
| H      | 6.4979890 | 3.9228990  | 1.7066790  |
| C      | 5.4654650 | 2.3761290  | -1.1503090 |
| C      | 5.9703340 | 3.3599730  | -0.3054530 |
| H      | 6.4982490 | 4.2194690  | -0.7061360 |
| C      | 5.4643880 | -0.1940450 | 2.6332860  |
| C      | 5.9684040 | -1.4179410 | 3.0629970  |
| H      | 6.4959960 | -1.5009950 | 4.0078480  |
| C      | 5.9673650 | -2.5566420 | 2.2050610  |
| H      | 6.4942060 | -3.4425710 | 2.5449490  |
| C      | 5.4623480 | -2.4804290 | 0.9104690  |
| C      | 5.4631780 | -2.1859630 | -1.4840110 |
| C      | 5.9687950 | -1.9466260 | -2.7582540 |
| H      | 6.4959070 | -2.7239530 | -3.3022050 |
| C      | 5.9699030 | -0.6341240 | -3.3151710 |
| H      | 6.4978040 | -0.4859010 | -4.2518280 |
| C      | 5.4651630 | 0.4492980  | -2.6022690 |
| C      | 5.7189470 | -3.2575860 | -0.4003690 |
| H      | 5.0429110 | -4.1126390 | -0.5057280 |
| H      | 6.7418290 | -3.6379280 | -0.4468340 |
| C      | 5.7231670 | 1.2798780  | 3.0188300  |
| H      | 5.0501700 | 1.6172420  | 3.8140230  |
| H      | 6.7472300 | 1.4280930  | 3.3687720  |
| C      | 5.7233240 | 1.9729440  | -2.6197650 |
| H      | 5.0490980 | 2.4926380  | -3.3085670 |
| H      | 6.7469510 | 2.2022320  | -2.9242550 |
| C      | 1.1770420 | 0.1875620  | -1.3876900 |
| C      | 1.1772080 | -0.1538370 | 1.3922480  |
| C      | 1.1779300 | 1.2857470  | -0.5602780 |



|   |            |            |            |
|---|------------|------------|------------|
| C | 1.1760180  | -1.1250380 | -0.8305150 |
| C | 1.1762210  | -1.2926660 | 0.5342420  |
| C | 1.1782970  | 1.1117690  | 0.8549740  |
| C | 1.7730750  | 2.4879710  | -0.9136060 |
| C | 2.2311460  | 2.5732700  | -2.2285740 |
| H | 2.7284940  | 3.4700820  | -2.5845330 |
| C | 1.7716810  | 0.1952690  | -2.6409850 |
| C | 2.2303650  | 1.4352740  | -3.0859140 |
| H | 2.7267060  | 1.5296000  | -4.0466960 |
| C | 1.7733650  | 2.1927240  | 1.4888180  |
| C | 2.2310060  | 1.9577430  | 2.7854820  |
| H | 2.7288030  | 2.7419320  | 3.3473840  |
| C | 2.2300750  | 0.6461350  | 3.3422230  |
| H | 2.7275700  | 0.5050810  | 4.2967360  |
| C | 1.7713910  | -0.4494020 | 2.6104280  |
| C | 1.7698940  | -2.3826480 | 1.1539120  |
| C | 2.2277550  | -3.3880400 | 0.3021340  |
| H | 2.7249650  | -4.2670140 | 0.7003250  |
| C | 2.2279910  | -3.2142520 | -1.1120530 |
| H | 2.7249940  | -3.9708040 | -1.7112670 |
| C | 1.7698550  | -2.0327760 | -1.6953300 |
| C | 2.0507540  | -1.9712880 | 2.6189600  |
| H | 1.4113790  | -2.5055000 | 3.3291320  |
| H | 3.0912650  | -2.1743400 | 2.8873830  |
| C | 2.0540130  | 3.2558160  | 0.4001280  |
| H | 1.4150450  | 4.1381900  | 0.5088600  |
| H | 3.0948430  | 3.5890210  | 0.4409190  |
| C | 2.0515430  | -1.2792430 | -3.0170440 |
| H | 1.4143590  | -1.6262950 | -3.8367960 |
| H | 3.0926230  | -1.4108640 | -3.3248620 |
| C | -2.4993900 | 1.2934720  | -0.5336540 |
| C | -2.5015690 | -1.2860210 | 0.5592510  |
| C | -2.4991320 | 1.1248370  | 0.8311060  |
| C | -2.5007440 | 0.1551730  | -1.3926740 |
| C | -2.5016740 | -1.1109340 | -0.8561820 |
| C | -2.4999590 | -0.1883590 | 1.3875700  |
| C | -1.9017720 | 2.0305010  | 1.6957140  |
| C | -1.4402400 | 3.2109340  | 1.1131590  |

|   |            |            |            |
|---|------------|------------|------------|
| H | -0.9381350 | 3.9640920  | 1.7122860  |
| C | -1.9027540 | 2.3823100  | -1.1525680 |
| C | -1.4406980 | 3.3856080  | -0.3006240 |
| H | -0.9386840 | 4.2617410  | -0.6990300 |
| C | -1.9028610 | -0.1978920 | 2.6398590  |
| C | -1.4426480 | -1.4380480 | 3.0825330  |
| H | -0.9411030 | -1.5326120 | 4.0406340  |
| C | -1.4446930 | -2.5753130 | 2.2244740  |
| H | -0.9443030 | -3.4716740 | 2.5772230  |
| C | -1.9067260 | -2.4889530 | 0.9110900  |
| C | -1.9068000 | -2.1917520 | -1.4905760 |
| C | -1.4466490 | -1.9563450 | -2.7861710 |
| H | -0.9464860 | -2.7399000 | -3.3466790 |
| C | -1.4456760 | -0.6446830 | -3.3420000 |
| H | -0.9453260 | -0.5032440 | -4.2949010 |
| C | -1.9053080 | 0.4505590  | -2.6103780 |
| C | -1.6271410 | -3.2558960 | -0.4031050 |
| H | -2.2672500 | -4.1375240 | -0.5126710 |
| H | -0.5868430 | -3.5904060 | -0.4443640 |
| C | -1.6192220 | 1.2756810  | 3.0160680  |
| H | -2.2539830 | 1.6241500  | 3.8372620  |
| H | -0.5772310 | 1.4045590  | 3.3218220  |
| C | -1.6222450 | 1.9715220  | -2.6175960 |
| H | -2.2590830 | 2.5087530  | -3.3279870 |
| H | -0.5807590 | 2.1713870  | -2.8843730 |
| C | -6.1998550 | 0.1889400  | -1.3905260 |
| C | -6.1985900 | -0.1539920 | 1.3967580  |
| C | -6.1987030 | 1.2894370  | -0.5609420 |
| C | -6.2007580 | -1.1277430 | -0.8320010 |
| C | -6.1998680 | -1.2959780 | 0.5358660  |
| C | -6.1980460 | 1.1147380  | 0.8585560  |
| C | -5.5924370 | 2.4867880  | -0.9123270 |
| C | -5.1174870 | 2.5678490  | -2.2225680 |
| H | -4.6047730 | 3.4595010  | -2.5694440 |
| C | -5.5944200 | 0.1963960  | -2.6387840 |
| C | -5.1183260 | 1.4329630  | -3.0779010 |
| H | -4.6068320 | 1.5204570  | -4.0313430 |
| C | -5.5914210 | 2.1911990  | 1.4892810  |

|   |            |            |            |
|---|------------|------------|------------|
| C | -5.1160570 | 1.9528130  | 2.7799460  |
| H | -4.6045320 | 2.7344110  | 3.3328700  |
| C | -5.1161730 | 0.6444160  | 3.3347700  |
| H | -4.6042070 | 0.4982450  | 4.2807400  |
| C | -5.5922540 | -0.4490200 | 2.6091630  |
| C | -5.5945410 | -2.3812110 | 1.1526860  |
| C | -5.1206000 | -3.3802120 | 0.3007110  |
| H | -4.6097770 | -4.2502980 | 0.7010600  |
| C | -5.1212880 | -3.2067310 | -1.1099150 |
| H | -4.6102110 | -3.9536640 | -1.7092430 |
| C | -5.5961200 | -2.0311700 | -1.6939880 |
| C | -5.3065940 | -1.9696310 | 2.6161190  |
| H | -5.9336060 | -2.5096190 | 3.3334980  |
| H | -4.2617960 | -2.1651110 | 2.8736750  |
| C | -5.3049780 | 3.2528960  | 0.4008880  |
| H | -5.9316980 | 4.1441540  | 0.5108300  |
| H | -4.2602410 | 3.5741400  | 0.4400190  |
| C | -5.3100270 | -1.2773410 | -3.0144270 |
| H | -5.9391940 | -1.6268410 | -3.8398310 |
| H | -4.2661920 | -1.4055150 | -3.3145860 |

Total energy: -3229.451937 Hartree

### Sumanene pentamer

| Symbol | X         | Y          | Z          |
|--------|-----------|------------|------------|
| C      | 6.6803520 | 0.3129290  | -1.3674630 |
| C      | 6.6793670 | -0.2835070 | 1.3723530  |
| C      | 6.6811730 | 1.3302880  | -0.4424100 |
| C      | 6.6792670 | -1.0482830 | -0.9326590 |
| C      | 6.6787490 | -1.3406940 | 0.4109720  |
| C      | 6.6805960 | 1.0263240  | 0.9538660  |
| C      | 7.3050870 | 2.5510160  | -0.6797890 |
| C      | 7.8101710 | 2.7453420  | -1.9619550 |
| H      | 8.3385590 | 3.6579040  | -2.2188390 |
| C      | 7.3031330 | 0.4331400  | -2.6058210 |
| C      | 7.8091820 | 1.6905850  | -2.9211660 |
| H      | 8.3368370 | 1.8593600  | -3.8544710 |
| C      | 7.3042400 | 2.0377940  | 1.6776620  |
| C      | 7.8086100 | 1.6815120  | 2.9248220  |

|   |           |            |            |
|---|-----------|------------|------------|
| H | 8.3368310 | 2.4046370  | 3.5380320  |
| C | 7.8073180 | 0.3234170  | 3.3587270  |
| H | 8.3345450 | 0.0889020  | 4.2779670  |
| C | 7.3016230 | -0.6891130 | 2.5489140  |
| C | 7.3005330 | -2.4739220 | 0.9256370  |
| C | 7.8050320 | -3.3763530 | -0.0059620 |
| H | 8.3318270 | -4.2695970 | 0.3142890  |
| C | 7.8055840 | -3.0731290 | -1.3990460 |
| H | 8.3327210 | -3.7525500 | -2.0612220 |
| C | 7.3015550 | -1.8650040 | -1.8715300 |
| C | 7.5582790 | -2.2081010 | 2.4259120  |
| H | 6.8840600 | -2.7884840 | 3.0645190  |
| H | 8.5818480 | -2.4650150 | 2.7077520  |
| C | 7.5635040 | 3.2036280  | 0.6969160  |
| H | 6.8905060 | 4.0476780  | 0.8806270  |
| H | 8.5875770 | 3.5748060  | 0.7780710  |
| C | 7.5600680 | -0.9994740 | -3.1252660 |
| H | 6.8865960 | -1.2620490 | -3.9478540 |
| H | 8.5839370 | -1.1159510 | -3.4875540 |
| C | 3.0138260 | -1.0263410 | -0.9525680 |
| C | 3.0140220 | 1.0458320  | 0.9322920  |
| C | 3.0138050 | 0.2835770  | -1.3708420 |
| C | 3.0138990 | -1.3298900 | 0.4407580  |
| C | 3.0140100 | -0.3126350 | 1.3659530  |
| C | 3.0138100 | 1.3384450  | -0.4113110 |
| C | 3.6087610 | 0.6899130  | -2.5564240 |
| C | 4.0673320 | -0.3337110 | -3.3858410 |
| H | 4.5646850 | -0.1055050 | -4.3233580 |
| C | 3.6087510 | -2.0445110 | -1.6832810 |
| C | 4.0672300 | -1.6909910 | -2.9524630 |
| H | 4.5645270 | -2.4202830 | -3.5842870 |
| C | 3.6087230 | 2.4803390  | -0.9276760 |
| C | 4.0675800 | 3.4026380  | 0.0129510  |
| H | 4.5652890 | 4.3141770  | -0.3029870 |
| C | 4.0677660 | 3.0994380  | 1.4051170  |
| H | 4.5658690 | 3.7969950  | 2.0712650  |
| C | 3.6090230 | 1.8693780  | 1.8769250  |
| C | 3.6087690 | -0.4363980 | 2.6131770  |

|   |            |            |            |
|---|------------|------------|------------|
| C | 4.0672920  | -1.7122400 | 2.9416250  |
| H | 4.5652720  | -1.8946050 | 3.8888040  |
| C | 4.0672070  | -2.7662330 | 1.9829370  |
| H | 4.5647510  | -3.6921470 | 2.2541030  |
| C | 3.6087450  | -2.5597960 | 0.6816970  |
| C | 3.8903320  | 0.9969890  | 3.1233910  |
| H | 3.2532190  | 1.2676960  | 3.9716420  |
| H | 4.9317900  | 1.0984750  | 3.4413800  |
| C | 3.8903820  | 2.2056420  | -2.4239970 |
| H | 3.2539270  | 2.8050080  | -3.0829530 |
| H | 4.9319510  | 2.4300180  | -2.6705360 |
| C | 3.8901160  | -3.2031370 | -0.6970230 |
| H | 3.2529070  | -4.0729140 | -0.8868340 |
| H | 4.9313260  | -3.5298770 | -0.7681320 |
| C | -0.6618550 | 0.3146090  | -1.3649010 |
| C | -0.6619840 | -0.2806770 | 1.3723450  |
| C | -0.6618250 | 1.3322380  | -0.4400050 |
| C | -0.6622580 | -1.0437970 | -0.9307130 |
| C | -0.6624000 | -1.3359530 | 0.4130870  |
| C | -0.6619660 | 1.0291760  | 0.9535790  |
| C | -0.0655360 | 2.5614510  | -0.6812630 |
| C | 0.3957540  | 2.7666040  | -1.9816170 |
| H | 0.8975440  | 3.6905460  | -2.2514880 |
| C | -0.0659400 | 0.4376680  | -2.6117190 |
| C | 0.3955340  | 1.7124260  | -2.9398750 |
| H | 0.8971590  | 1.8930130  | -3.8854400 |
| C | -0.0656800 | 2.0471840  | 1.6835340  |
| C | 0.3960770  | 1.6937510  | 2.9514190  |
| H | 0.8982110  | 2.4222130  | 3.5802690  |
| C | 0.3962640  | 0.3367650  | 3.3851970  |
| H | 0.8984510  | 0.1083480  | 4.3200420  |
| C | -0.0655910 | -0.6866170 | 2.5574530  |
| C | -0.0666830 | -2.4774190 | 0.9295660  |
| C | 0.3938350  | -3.3993480 | -0.0104790 |
| H | 0.8951020  | -4.3086990 | 0.3058900  |
| C | 0.3938280  | -3.0967200 | -1.4025790 |
| H | 0.8950720  | -3.7927310 | -2.0678700 |
| C | -0.0666180 | -1.8675640 | -1.8747930 |

|   |            |            |            |
|---|------------|------------|------------|
| C | 0.2159690  | -2.2021480 | 2.4253530  |
| H | -0.4203730 | -2.8014520 | 3.0846530  |
| H | 1.2577790  | -2.4261310 | 2.6710030  |
| C | 0.2160560  | 3.2050700  | 0.6969820  |
| H | -0.4204560 | 4.0756160  | 0.8864070  |
| H | 1.2575660  | 3.5306270  | 0.7678640  |
| C | 0.2156730  | -0.9957350 | -3.1210890 |
| H | -0.4206650 | -1.2670530 | -3.9698310 |
| H | 1.2574420  | -1.0973650 | -3.4377520 |
| C | -4.3377050 | -1.0269180 | -0.9520240 |
| C | -4.3398960 | 1.0463350  | 0.9322020  |
| C | -4.3384380 | 0.2829430  | -1.3708850 |
| C | -4.3381330 | -1.3299390 | 0.4416990  |
| C | -4.3392510 | -0.3121830 | 1.3665330  |
| C | -4.3396340 | 1.3384110  | -0.4116580 |
| C | -3.7415080 | 0.6890390  | -2.5556450 |
| C | -3.2786960 | -0.3340220 | -3.3832330 |
| H | -2.7753540 | -0.1050440 | -4.3172840 |
| C | -3.7398010 | -2.0443200 | -1.6815120 |
| C | -3.2778400 | -1.6907660 | -2.9493160 |
| H | -2.7738800 | -2.4186770 | -3.5773580 |
| C | -3.7435550 | 2.4797750  | -0.9279670 |
| C | -3.2826560 | 3.4015640  | 0.0120630  |
| H | -2.7802260 | 4.3102080  | -0.3045020 |
| C | -3.2829430 | 3.0990250  | 1.4039900  |
| H | -2.7805740 | 3.7942080  | 2.0692910  |
| C | -3.7441490 | 1.8701300  | 1.8762010  |
| C | -3.7432310 | -0.4348240 | 2.6133400  |
| C | -3.2809020 | -1.7091870 | 2.9418030  |
| H | -2.7781620 | -1.8888140 | 3.8869380  |
| C | -3.2796500 | -2.7633300 | 1.9837990  |
| H | -2.7758690 | -3.6862450 | 2.2534990  |
| C | -3.7405180 | -2.5584690 | 0.6832560  |
| C | -3.4610380 | 0.9984900  | 3.1223060  |
| H | -4.0961960 | 1.2699200  | 3.9719670  |
| H | -2.4186440 | 1.0997700  | 3.4371760  |
| C | -3.4594820 | 2.2043480  | -2.4233530 |
| H | -4.0941910 | 2.8040920  | -3.0839390 |

|   |            |            |            |
|---|------------|------------|------------|
| H | -2.4169760 | 2.4272610  | -2.6671640 |
| C | -3.4560170 | -3.2013560 | -0.6946490 |
| H | -4.0901250 | -4.0735510 | -0.8845720 |
| H | -2.4134120 | -3.5238260 | -0.7644600 |
| C | -8.0375220 | 0.3110690  | -1.3710930 |
| C | -8.0386290 | -0.2852760 | 1.3733910  |
| C | -8.0386920 | 1.3311830  | -0.4442990 |
| C | -8.0369970 | -1.0513280 | -0.9353400 |
| C | -8.0376580 | -1.3439000 | 0.4115290  |
| C | -8.0392480 | 1.0274250  | 0.9534340  |
| C | -7.4324520 | 2.5560040  | -0.6840600 |
| C | -6.9555090 | 2.7570040  | -1.9803450 |
| H | -6.4420030 | 3.6765800  | -2.2430120 |
| C | -7.4300090 | 0.4335050  | -2.6125340 |
| C | -6.9542570 | 1.7051670  | -2.9359980 |
| H | -6.4400330 | 1.8793180  | -3.8759620 |
| C | -7.4335510 | 2.0422150  | 1.6804350  |
| C | -6.9577020 | 1.6870910  | 2.9436210  |
| H | -6.4446180 | 2.4147020  | 3.5645730  |
| C | -6.9570030 | 0.3334980  | 3.3766360  |
| H | -6.4438080 | 0.1018890  | 4.3046680  |
| C | -7.4321030 | -0.6892480 | 2.5541830  |
| C | -7.4305520 | -2.4800300 | 0.9269910  |
| C | -6.9531480 | -3.3958480 | -0.0119120 |
| H | -6.4391200 | -4.2967740 | 0.3080770  |
| C | -6.9522210 | -3.0940710 | -1.4006240 |
| H | -6.4373080 | -3.7810040 | -2.0649180 |
| C | -7.4290240 | -1.8710950 | -1.8752910 |
| C | -7.1436290 | -2.2035830 | 2.4218820  |
| H | -7.7698480 | -2.8080360 | 3.0865730  |
| H | -6.0986180 | -2.4202040 | 2.6611050  |
| C | -7.1461930 | 3.1987960  | 0.6937580  |
| H | -7.7732890 | 4.0762170  | 0.8841320  |
| H | -6.1015100 | 3.5150600  | 0.7629710  |
| C | -7.1408780 | -0.9990890 | -3.1202510 |
| H | -7.7657190 | -1.2733930 | -3.9767790 |
| H | -6.0953260 | -1.0966780 | -3.4260910 |

Total energy: -4036.826565 Hartree

**Sumanene heptamer**

| Symbol | X          | Y          | Z          |
|--------|------------|------------|------------|
| C      | 10.3564810 | -1.0274870 | -0.9518800 |
| C      | 10.3559440 | 1.0500800  | 0.9311800  |
| C      | 10.3539550 | 0.2816240  | -1.3724980 |
| C      | 10.3586210 | -1.3292580 | 0.4447830  |
| C      | 10.3582430 | -0.3104220 | 1.3682280  |
| C      | 10.3537260 | 1.3403750  | -0.4128740 |
| C      | 10.9744710 | 0.6855910  | -2.5504620 |
| C      | 11.4796280 | -0.3279790 | -3.3592890 |
| H      | 12.0055330 | -0.0947220 | -4.2795910 |
| C      | 10.9794770 | -2.0399200 | -1.6748470 |
| C      | 11.4821240 | -1.6853810 | -2.9231980 |
| H      | 12.0098810 | -2.4091980 | -3.5359750 |
| C      | 10.9740040 | 2.4732010  | -0.9302790 |
| C      | 11.4790320 | 3.3774740  | -0.0007360 |
| H      | 12.0048750 | 4.2705370  | -0.3230100 |
| C      | 11.4815060 | 3.0764170  | 1.3928710  |
| H      | 12.0091980 | 3.7571600  | 2.0532330  |
| C      | 10.9788270 | 1.8687410  | 1.8680120  |
| C      | 10.9825880 | -0.4283590 | 2.6059580  |
| C      | 11.4893310 | -1.6852190 | 2.9227900  |
| H      | 12.0181990 | -1.8522550 | 3.8557120  |
| C      | 11.4895550 | -2.7415970 | 1.9653680  |
| H      | 12.0185340 | -3.6535590 | 2.2231660  |
| C      | 10.9830910 | -2.5494460 | 0.6834030  |
| C      | 11.2399070 | 1.0051140  | 3.1226720  |
| H      | 10.5684180 | 1.2685580  | 3.9465820  |
| H      | 12.2645080 | 1.1224530  | 3.4826210  |
| C      | 11.2291680 | 2.2051580  | -2.4307320 |
| H      | 10.5511190 | 2.7824470  | -3.0680730 |
| H      | 12.2512230 | 2.4640130  | -2.7160520 |
| C      | 11.2406700 | -3.2040790 | -0.6925500 |
| H      | 10.5692310 | -4.0499260 | -0.8740690 |
| H      | 12.2653170 | -3.5736660 | -0.7739320 |
| C      | 6.6917070  | -1.3385200 | 0.4136260  |
| C      | 6.6888140  | 1.3289030  | -0.4416330 |
| C      | 6.6911850  | -1.0474010 | -0.9303170 |



|   |           |            |            |
|---|-----------|------------|------------|
| C | 6.6908540 | -0.2824990 | 1.3718760  |
| C | 6.6893020 | 1.0269130  | 0.9520110  |
| C | 6.6897780 | 0.3105900  | -1.3656760 |
| C | 7.2871810 | -1.8713970 | -1.8739190 |
| C | 7.7471170 | -3.1005150 | -1.4007200 |
| H | 8.2460480 | -3.7981020 | -2.0661390 |
| C | 7.2877330 | -2.4792300 | 0.9313960  |
| C | 7.7473480 | -3.4022350 | -0.0082620 |
| H | 8.2462600 | -4.3127560 | 0.3085850  |
| C | 7.2846030 | 0.4334740  | -2.6129290 |
| C | 7.7417800 | 1.7095310  | -2.9428110 |
| H | 8.2390220 | 1.8913850  | -3.8905010 |
| C | 7.7404430 | 2.7647360  | -1.9854170 |
| H | 8.2368410 | 3.6909730  | -2.2576490 |
| C | 7.2820760 | 2.5593180  | -0.6839750 |
| C | 7.2830710 | 2.0466530  | 1.6814710  |
| C | 7.7426010 | 1.6951830  | 2.9508020  |
| H | 8.2395840 | 2.4257690  | 3.5813940  |
| C | 7.7444040 | 0.3384220  | 3.3857820  |
| H | 8.2427090 | 0.1119530  | 4.3232150  |
| C | 7.2864860 | -0.6866890 | 2.5578220  |
| C | 7.5629350 | 3.2045450  | 0.6939780  |
| H | 6.9255240 | 4.0743680  | 0.8831560  |
| H | 8.6039100 | 3.5320970  | 0.7645270  |
| C | 7.5681020 | -1.0001220 | -3.1212840 |
| H | 6.9327120 | -1.2731020 | -3.9700010 |
| H | 8.6099590 | -1.1006700 | -3.4381300 |
| C | 7.5690160 | -2.2023910 | 2.4275230  |
| H | 6.9326390 | -2.8012350 | 3.0871170  |
| H | 8.6105260 | -2.4260780 | 2.6748260  |
| C | 3.0137530 | -1.0290470 | -0.9520070 |
| C | 3.0128130 | 1.0456660  | 0.9303080  |
| C | 3.0130180 | 0.2804330  | -1.3719940 |
| C | 3.0142930 | -1.3308960 | 0.4418120  |
| C | 3.0138560 | -0.3124100 | 1.3658240  |
| C | 3.0124250 | 1.3366520  | -0.4137380 |
| C | 3.6089580 | 0.6853880  | -2.5576020 |
| C | 4.0708820 | -0.3385150 | -3.3846080 |

|   |            |            |            |
|---|------------|------------|------------|
| H | 4.5728340  | -0.1106610 | -4.3196790 |
| C | 3.6102780  | -2.0474720 | -1.6812340 |
| C | 4.0716010  | -1.6950660 | -2.9495510 |
| H | 4.5743470  | -2.4236020 | -3.5778320 |
| C | 3.6075990  | 2.4778610  | -0.9315770 |
| C | 4.0680160  | 3.4008660  | 0.0074930  |
| H | 4.5695470  | 4.3096770  | -0.3099190 |
| C | 4.0684640  | 3.0994570  | 1.3998650  |
| H | 4.5701310  | 3.7959190  | 2.0643370  |
| C | 3.6086580  | 1.8705250  | 1.8733830  |
| C | 3.6105230  | -0.4340640 | 2.6123820  |
| C | 4.0727630  | -1.7083760 | 2.9414500  |
| H | 4.5753190  | -1.8876380 | 3.8867250  |
| C | 4.0731300  | -2.7634810 | 1.9842240  |
| H | 4.5760220  | -3.6866720 | 2.2545520  |
| C | 3.6111170  | -2.5596970 | 0.6839300  |
| C | 3.8926710  | 0.9997550  | 3.1200780  |
| H | 3.2585990  | 1.2718720  | 3.9701790  |
| H | 4.9350220  | 1.1015110  | 3.4346490  |
| C | 3.8905250  | 2.2009480  | -2.4270910 |
| H | 3.2548510  | 2.7997780  | -3.0875470 |
| H | 4.9323630  | 2.4245470  | -2.6728290 |
| C | 3.8929470  | -3.2043420 | -0.6937850 |
| H | 3.2573410  | -4.0757550 | -0.8822940 |
| H | 4.9347000  | -3.5291220 | -0.7645080 |
| C | -0.6621430 | -1.3396950 | 0.4133230  |
| C | -0.6627980 | 1.3277150  | -0.4429900 |
| C | -0.6622580 | -1.0490460 | -0.9308710 |
| C | -0.6625620 | -0.2831790 | 1.3713330  |
| C | -0.6630010 | 1.0262320  | 0.9509470  |
| C | -0.6625860 | 0.3089750  | -1.3667740 |
| C | -0.0651670 | -1.8733540 | -1.8736430 |
| C | 0.3967530  | -3.1013630 | -1.3998190 |
| H | 0.9008440  | -3.7964730 | -2.0638400 |
| C | -0.0652100 | -2.4799290 | 0.9313210  |
| C | 0.3967560  | -3.4024330 | -0.0074920 |
| H | 0.9006660  | -4.3098650 | 0.3101100  |
| C | -0.0659090 | 0.4308540  | -2.6133150 |

|   |            |            |            |
|---|------------|------------|------------|
| C | 0.3955740  | 1.7053330  | -2.9427080 |
| H | 0.8989770  | 1.8841970  | -3.8876020 |
| C | 0.3952340  | 2.7605970  | -1.9858130 |
| H | 0.8985770  | 3.6836050  | -2.2558730 |
| C | -0.0665840 | 2.5567640  | -0.6854770 |
| C | -0.0669630 | 2.0452220  | 1.6797710  |
| C | 0.3947580  | 1.6936640  | 2.9481640  |
| H | 0.8978820  | 2.4227200  | 3.5754990  |
| C | 0.3953070  | 0.3373550  | 3.3835860  |
| H | 0.8985160  | 0.1099950  | 4.3181100  |
| C | -0.0658560 | -0.6871410 | 2.5568950  |
| C | 0.2163870  | 3.2014690  | 0.6919080  |
| H | -0.4179910 | 4.0737770  | 0.8804870  |
| H | 1.2587870  | 3.5244340  | 0.7619760  |
| C | 0.2182580  | -1.0026600 | -3.1204560 |
| H | -0.4150430 | -1.2759400 | -3.9708130 |
| H | 1.2610760  | -1.1030020 | -3.4340150 |
| C | 0.2185580  | -2.2021040 | 2.4264590  |
| H | -0.4145740 | -2.8022970 | 3.0881330  |
| H | 1.2614670  | -2.4227920 | 2.6704720  |
| C | -4.3381440 | -1.0275940 | -0.9514250 |
| C | -4.3380510 | 1.0477050  | 0.9304290  |
| C | -4.3381430 | 0.2818320  | -1.3718160 |
| C | -4.3378660 | -1.3290910 | 0.4425470  |
| C | -4.3379800 | -0.3103430 | 1.3663470  |
| C | -4.3380350 | 1.3383640  | -0.4137780 |
| C | -3.7412270 | 0.6859490  | -2.5572430 |
| C | -3.2792550 | -0.3382950 | -3.3837360 |
| H | -2.7749100 | -0.1106540 | -4.3175670 |
| C | -3.7414550 | -2.0462920 | -1.6801660 |
| C | -3.2793800 | -1.6945670 | -2.9483420 |
| H | -2.7750530 | -2.4232200 | -3.5751860 |
| C | -3.7412370 | 2.4787050  | -0.9317260 |
| C | -3.2794520 | 3.4013140  | 0.0070370  |
| H | -2.7752690 | 4.3085680  | -0.3106370 |
| C | -3.2793460 | 3.1002510  | 1.3993410  |
| H | -2.7751850 | 3.7952700  | 2.0634220  |
| C | -3.7410050 | 1.8721480  | 1.8731230  |

|   |            |            |            |
|---|------------|------------|------------|
| C | -3.7409690 | -0.4320200 | 2.6127670  |
| C | -3.2787560 | -1.7062370 | 2.9420770  |
| H | -2.7744900 | -1.8846950 | 3.8865790  |
| C | -3.2786860 | -2.7614390 | 1.9851790  |
| H | -2.7742230 | -3.6839240 | 2.2549250  |
| C | -3.7409070 | -2.5578050 | 0.6849980  |
| C | -3.4567550 | 1.0015110  | 3.1197620  |
| H | -4.0895950 | 1.2747860  | 3.9704580  |
| H | -2.4136600 | 1.1019200  | 3.4324450  |
| C | -3.4568480 | 2.2008450  | -2.4267020 |
| H | -4.0896140 | 2.8011200  | -3.0886950 |
| H | -2.4137420 | 2.4213020  | -2.6701000 |
| C | -3.4573610 | -3.2022750 | -0.6923130 |
| H | -4.0910850 | -4.0751030 | -0.8808780 |
| H | -2.4146270 | -3.5243150 | -0.7622780 |
| C | -8.0144950 | -1.3391720 | 0.4132380  |
| C | -8.0145000 | 1.3285050  | -0.4428470 |
| C | -8.0147380 | -1.0483740 | -0.9309510 |
| C | -8.0145360 | -0.2826450 | 1.3714440  |
| C | -8.0146220 | 1.0268470  | 0.9511840  |
| C | -8.0147580 | 0.3098310  | -1.3667610 |
| C | -7.4171250 | -1.8724550 | -1.8736110 |
| C | -6.9544240 | -3.1002470 | -1.4000060 |
| H | -6.4493890 | -3.7945140 | -2.0642330 |
| C | -7.4169060 | -2.4792290 | 0.9309160  |
| C | -6.9543430 | -3.4014340 | -0.0078630 |
| H | -6.4492210 | -4.3081500 | 0.3098950  |
| C | -7.4173570 | 0.4315820  | -2.6129950 |
| C | -6.9546570 | 1.7056730  | -2.9421080 |
| H | -6.4498010 | 1.8839760  | -3.8863230 |
| C | -6.9545600 | 2.7607230  | -1.9852060 |
| H | -6.4495880 | 3.6830150  | -2.2546660 |
| C | -7.4171300 | 2.5570560  | -0.6851560 |
| C | -7.4174540 | 2.0453280  | 1.6798260  |
| C | -6.9550210 | 1.6935210  | 2.9478730  |
| H | -6.4504720 | 2.4221190  | 3.5746030  |
| C | -6.9547080 | 0.3373130  | 3.3830420  |
| H | -6.4500160 | 0.1094740  | 4.3166370  |

|   |             |            |            |
|---|-------------|------------|------------|
| C | -7.4170150  | -0.6867940 | 2.5565370  |
| C | -7.1330110  | 3.2012700  | 0.6920850  |
| H | -7.7660730  | 4.0744980  | 0.8810630  |
| H | -6.0900150  | 3.5225130  | 0.7617880  |
| C | -7.1331310  | -1.0017840 | -3.1201810 |
| H | -7.7661270  | -1.2749580 | -3.9708140 |
| H | -6.0900250  | -1.1020690 | -3.4329350 |
| C | -7.1324280  | -2.2015950 | 2.4258610  |
| H | -7.7653360  | -2.8018740 | 3.0877490  |
| H | -6.0892760  | -2.4219880 | 2.6691830  |
| C | -11.7152970 | -1.0289690 | -0.9532180 |
| C | -11.7146210 | 1.0514460  | 0.9335640  |
| C | -11.7150980 | 0.2833530  | -1.3744030 |
| C | -11.7151370 | -1.3315000 | 0.4447580  |
| C | -11.7148310 | -0.3105600 | 1.3706090  |
| C | -11.7147940 | 1.3428890  | -0.4135430 |
| C | -11.1081520 | 0.6863250  | -2.5551650 |
| C | -10.6316940 | -0.3369010 | -3.3763540 |
| H | -10.1176980 | -0.1056550 | -4.3040470 |
| C | -11.1086970 | -2.0440510 | -1.6789140 |
| C | -10.6320270 | -1.6899970 | -2.9421340 |
| H | -10.1182810 | -2.4180610 | -3.5620340 |
| C | -11.1076340 | 2.4785500  | -0.9298900 |
| C | -10.6303920 | 3.3952380  | 0.0083840  |
| H | -10.1158490 | 4.2956110  | -0.3122370 |
| C | -10.6301050 | 3.0947270  | 1.3973720  |
| H | -10.1155820 | 3.7822100  | 2.0613950  |
| C | -11.1071100 | 1.8721180  | 1.8729700  |
| C | -11.1076720 | -0.4315800 | 2.6122500  |
| C | -10.6312230 | -1.7027670 | 2.9370010  |
| H | -10.1171080 | -1.8756180 | 3.8772560  |
| C | -10.6314750 | -2.7554260 | 1.9822780  |
| H | -10.1173640 | -3.6744240 | 2.2457000  |
| C | -11.1083520 | -2.5557550 | 0.6857340  |
| C | -10.8195690 | 1.0014160  | 3.1189880  |
| H | -11.4451280 | 1.2762070  | 3.9748550  |
| H | -9.7743120  | 1.0995780  | 3.4255350  |
| C | -10.8203400 | 2.2007460  | -2.4244670 |

|   |             |            |            |
|---|-------------|------------|------------|
| H | -11.4463520 | 2.8044840  | -3.0900400 |
| H | -9.7752590  | 2.4170490  | -2.6635750 |
| C | -10.8211310 | -3.1996220 | -0.6912880 |
| H | -11.4476470 | -4.0775950 | -0.8811960 |
| H | -9.7762340  | -3.5152850 | -0.7598320 |

Total energy: -5651.576032 Hartree
